# Supplementary material for: Sensing properties of light-emitting single walled carbon nanotubes prepared via click chemistry of ylides bound to the nanotube surface
Source: Royal Society of Chemistry journal article supplement (doi:10.1039/c5ra04330a), 2015-01-01
Supplement: c5ra04330a1.pdf [file c5ra04330a1.pdf]

# Sensing Properties of Light-Emitting Single Walled Carbon Nanotubes Prepared via Click Chemistry of Ylides Bound to Nanotube

Mustafa K. Bayazit<sup>a,b,\*</sup>, Lars Olof Palsson<sup>a</sup> and Karl S. Coleman<sup>a</sup>

<sup>a</sup>Department of Chemistry, Durham University, South Road, Durham DH1 3LE, UK

<sup>b</sup>Current Address: Department of Chemical Engineering, University College London, London WC1E 7JE, UK

Email: m.bayazit@ucl.ac.uk

## Supporting Information

### Experimental Details

**1. SWCNT-Indolizine (1b).** To a dispersion of **1a** (5 mg) in dry DMF (10 mL), dispersed using an ultrasonic bath (Ultrawave U50, 30 – 40 kHz) for 5 mins, was added dimethyl acetylenedicarboxylate (DMAD) (5 mL, 5.78 g, 40.67 mmol). The reaction mixture was stirred at room temperature for 1 h and then triethylamine (1 mL, 0.73 g, 7.17 mmol) added and the reaction stirred for a further 5 h at room temperature and then 15 h at 60 °C. The reaction was quenched by the addition of high purity water (50 mL) and the mixture filtered through a PTFE membrane (0.2 µm, Whatman). The SWCNTs were re-dispersed and filtered through a PTFE membrane using THF (2 × 30 mL), acetone (2 × 30 mL) and ethanol (2 × 30 mL), respectively to remove any residual organic material and dried overnight at 80 °C to afford SWCNT-indolizine (**1b**).

**2. PEG<sub>2000</sub>-yl 2-bromoacetate.** PEG<sub>2000</sub>-yl 2-bromoacetate was prepared following the literature procedure<sup>1</sup> and characterized using FTIR, <sup>1</sup>H and <sup>13</sup>C NMR. IR (ATR) (ν<sub>C=O</sub> 1745 cm<sup>-1</sup>), (ν<sub>C-H</sub> 2885 cm<sup>-1</sup>), (ν<sub>H<sub>2</sub>C-O-CH<sub>2</sub></sub> 1096 cm<sup>-1</sup>); <sup>1</sup>H NMR (400 MHz, CDCl<sub>3</sub>): 4.3-4.4 (t, COOCH<sub>2</sub>), 3.8-3.9 (s, CH<sub>2</sub>Br), 3.6-3.7 (m, PEG chain protons), 3.4-3.5 (m, CH<sub>2</sub>OH), 3.3-3.4 (s, OH; <sup>13</sup>C NMR (100MHz, CDCl<sub>3</sub>): 167.9 (COOR), 71.4 (OCH<sub>2</sub>CH<sub>2</sub>O), 26.2 (CH<sub>2</sub>Br).

**3. SWNT-Pyridinium PEG-Ester Salt (2a).** To a dispersion of SWNT-Py (5 mg) in dryDMF (10 mL), dispersed using an ultrasonic bath (Ultrawave U50, 30 – 40 kHz) for 5 mins, was added PEG<sub>2000</sub>-yl 2-bromoacetate (11.1 g, 5 mmol) and the reaction mixture stirred at room temperature for 12 hours. The modified SWCNTs were washed and isolated using the method described above for **1a** and dried overnight at 80 °C to afford SWCNT-pyridinium ester salt (**2a**).

**4. SWCNT-Indolizine (2b).** SWNT-Pyridinium PEG-Ester Salt (**2a**) (5 mg) in dry DMF (10 mL) was dispersed using an ultrasonic bath (Ultrawave U50, 30 – 40 kHz) for 10 mins and heated to 80 °C in an oil bath. Dimethylacetylenedicarboxylate (5 mL, 40.67 mmol) and triethylamine (1 mL, 7.17 mmol) were then added to nanotube dispersion, respectively. The reaction mixture was stirred for 15 h at 80 °C. The modified SWCNTs were washed and isolated using the method described above for **1b** and dried overnight at 80 °C to afford SWCNT-Indolizine (**2b**).

**5. SWCNT-Pyridinium Nitrobenzyl Salt (3a).** To a dispersion of SWNT-Py (5 mg) in dry DMF (10 mL), dispersed using an ultrasonic bath (Ultrawave U50, 30 – 40 kHz) for 5 mins, was added p-nitrobenzyl bromide (5.4 g, 25 mmol) and the reaction mixture stirred at room temperature for 12 hours. The modified SWCNTs were washed the method described above for **1a** and dried overnight at 80 °C to afford SWCNT-Pyridinium nitrobenzyl salt (**3a**).

**6. SWCNT-Indolizine (3b).** *SWCNT-Pyridinium Nitrobenzyl Salt (3a)* (5 mg) in dry DMF (10 mL) was dispersed using an ultrasonic bath (Ultrawave U50, 30 – 40 kHz) for 10 mins and heated to 80 °C in an oil bath. Dimethylacetylenedicarboxylate (5 mL, 40.67 mmol) and triethylamine (1 mL, 7.17 mmol) were then added to nanotube dispersion, respectively. The reaction mixture was stirred for 15 h at 80 °C. The modified SWCNTs were washed and isolated using the method described above for **1b** and dried overnight at 80 °C to afford SWCNT-Indolizine (**3b**).

**7. SWCNT-Indolizine (3c).** SWNT-indolizine (**3b**) was reduced using the literature procedure.<sup>2</sup> The modified SWCNTs were re-dispersed and filtered through a nylon membrane using THF (2 × 30 mL), acetone (2 × 30 mL) and ethanol (2 × 30 mL), respectively to remove any residual organic material and dried overnight at 80 °C to afford SWNT-indolizine (**3c**).

**8. 3-ethyl 1,2-dimethyl indolizine-1,2,3-tricarboxylate (FI).** Pyridine (7.91g, 100 mmol) was added to ethyl bromoacetate (18.37g, 110 mmol) and the mixture stirred for 12 h at room temperature. The resulting off-white solid was washed with diethyl ether (3 x 20 mL) to afford the pyridinium bromide salt *N*-(ethoxycarbonylmethyl)-pyridinium bromide (22.64 g, 92%). At room temperature with vigorous stirring, N(CH<sub>2</sub>CH<sub>3</sub>)<sub>3</sub> (0.283g, 2.8 mmol) was added to the pyridinium bromide salt (0.689g, 2.8 mmol) in 10 mL CHCl<sub>3</sub> followed by drop wise addition of dimethylacetylenedicarboxylate (DMAD) (0.308g, 2.8 mmol). After solvent removal, the product was eluted with chloroform and crystallized from diethylether. Yield 75% (0.596 g); mp 115.5-116.5 °C; R<sub>f</sub> 0.47 (CHCl<sub>3</sub>); IR (neat) (ν<sub>CO</sub> 1740 cm<sup>-1</sup>), (ν<sub>CO</sub> 1708 cm<sup>-1</sup>); <sup>1</sup>H NMR (400MHz, CDCl<sub>3</sub>): 9.47 (d, *J*=7.15 Hz, 1H), 8.26 (d, *J*=9.05 Hz, 1H), 7.31 (m, *J*=8.04 Hz, 1H), 6.97 (m, *J*=7.01 Hz, 1H), 4.30 (q, *J*=7.20 Hz, 2H), 3.92 (s, 3H), 3.82 (s, 3H), 1.32 (t, *J*=7.12 Hz, 3H). <sup>13</sup>C NMR (100MHz, CDCl<sub>3</sub>): 165.2, 162.3, 159.1, 151.3, 136.8, 129.5, 126.9, 125.6, 118.9, 114.3, 101.9, 59.9, 51.7, 50.6, 13.1; *m/z* (*ES*<sup>+</sup>): 305 (M<sup>+</sup>, 100 %).

**Characterization. XPS.** XPS studies were performed at NCESS, Daresbury laboratory using a Scienta ESCA 300 hemispherical analyser with a base pressure under 3×10<sup>-9</sup> mbar. The analysis chamber was equipped with a monochromated Al K<sub>α</sub> X-ray source (*hν*= 1486.6 eV). Charge compensation was achieved (if required) by supplying low energy (<3 eV) electrons to the samples. XPS data were referenced with respect to the corresponding C 1s binding energy of 284.5 eV which is typical for carbon nanotubes.<sup>17</sup> Photoelectrons were collected at

a 45 degree take-off angle, and the analyzer pass energy was set to 150 eV giving an overall energy resolution of 0.4 eV.

**UV-vis-NIR spectroscopy.** The UV-vis-NIR absorption spectra were recorded on a Perkin Elmer Lambda 900 spectrometer. The samples were prepared by dispersing the nanotube material in either DMF or ethanol (EtOH) by sonication in an ultrasonic bath (Ultrawave U50, 30 – 40 kHz) for 15 mins. Dispersions of modified SWCNTs were left for settling overnight before recording the UV-vis-NIR spectra. Stable supernatant solutions of the corresponding materials were used to calculate the solubility of each of the modified SWCNTs.

**TGA-MS.** Thermogravimetric analysis – mass spectrometry (TGA-MS) data were recorded on 1–3 mg of sample using a Perkin Elmer Pyris I coupled to a Hiden HPR20 mass spectrometer. As a standard procedure, prior to the thermal analysis solid materials were finely ground in an agate mortar to prepare homogeneous samples. Data were recorded in flowing He (20 mL min<sup>-1</sup>) at a ramp rate of 10 °C min<sup>-1</sup> to 900 °C after being held at 120 °C for 30 mins to remove any residual solvent.

**FTIR Spectroscopy.** Infrared spectra were recorded on thick films using a Perkin Elmer Spectrum 100 equipped with a Pike ATR fitted with a Ge crystal.

**Fluorescence Spectroscopy.** Fluorescence spectra were recorded on a Perkin Elmer LS55 luminescence spectrometer using an excitation wavelength of 335 nm. Samples were prepared by dispersing SWCNTs in either DMF (10 µg mL<sup>-1</sup>) or CH<sub>3</sub>CN (10 µg mL<sup>-1</sup>) by sonication in an ultrasonic bath (Ultrawave U50, 30 – 40 kHz) for 15 mins, and allowing them to settle for 8h followed by filtration through a plug of cotton wool.

**Fluorimeter.** Luminescence spectra of the indolizine modified SWCNTs (solid sample) were recorded using a Jobin Yvon Horiba Fluoromax-3 coupled with a PTFE-coated integrating sphere (Glen Spectra). The sample material was drop-dried onto a 10 mm

diameter quartz substrate and mounted about 20 mm into the sphere from a holder in the entry port facing the excitation light beam. The measured spectra were background corrected by subtracting the spectrum obtained using a blank substrate and subsequently corrected for the wavelength sensitivity of the fluorimeter and spectral response of the sphere. The spectral response of the sphere was determined using a calibrated tungsten lamp (Ocean Optic) and the fluorimeter as detector.<sup>3</sup>

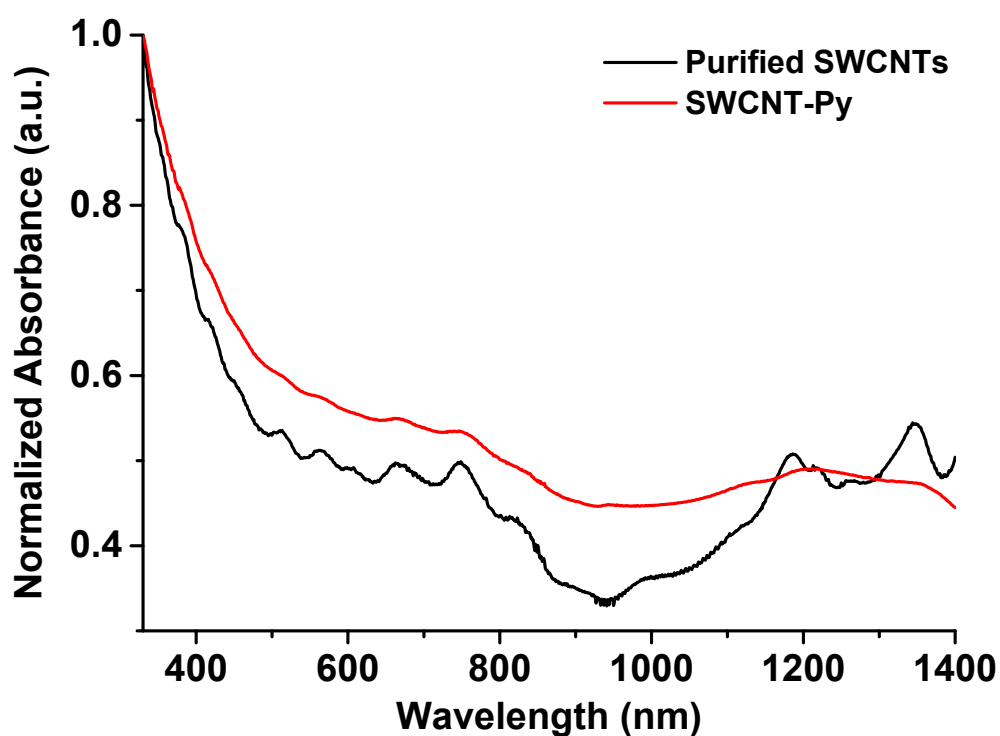

**Figure S1** Normalized (at 330 nm) UV/vis-NIR spectra, recorded in *N,N*-dimethylformamide, of purified SWCNTs (black) and pyridine-functionalized SWCNTs (red). SWCNT-Py shows suppressed electronic transition bands compared to unmodified purified SWCNTs.

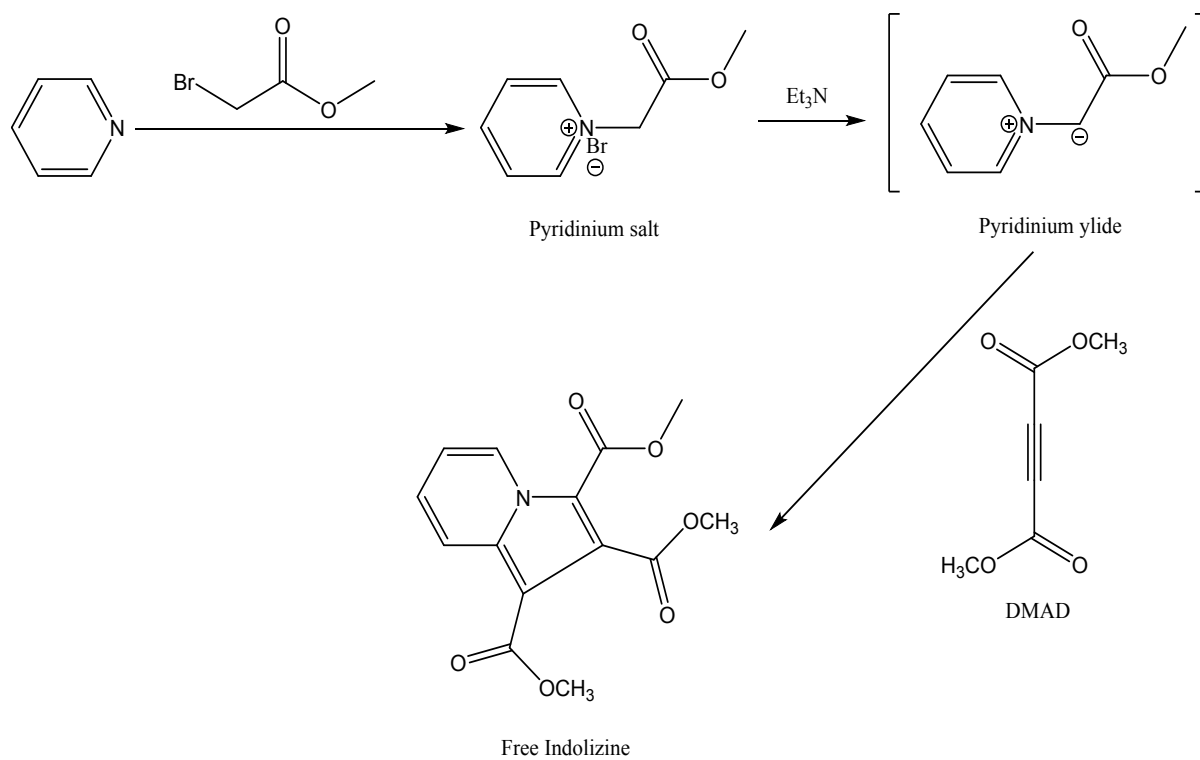

**Scheme S1** Schematic representation of the synthesis of 3-ethyl 1,2-dimethyl indolizine-1,2,3-tricarboxylate (Free Indolizine).

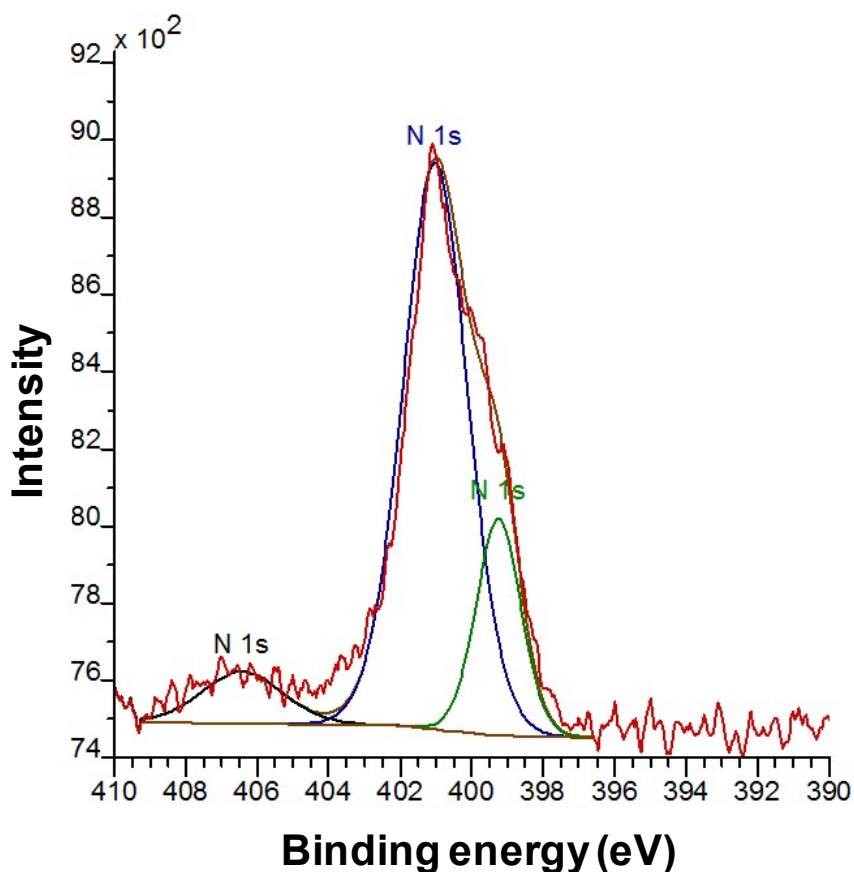

**Figure S2** Deconvoluted N 1s XPS spectrum of the indolizine modified SWCNTs (**3c**). Curves were fitted after auto Shirley background using the CASAXPS software provided with XPS system. Figure shows suppressed NO<sub>2</sub> group based N 1s XPS spectrum at *ca.* 406 eV compared to **3b**. From the spectrum it is clear that whole NO<sub>2</sub> groups were not converted into NH<sub>2</sub> groups.

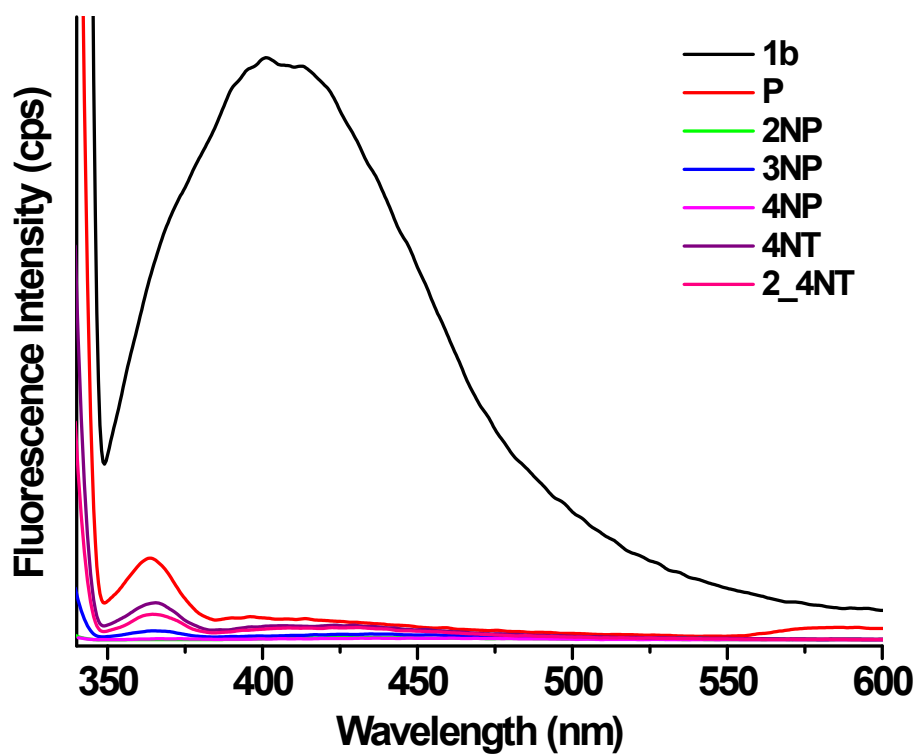

**Figure S3** Fluorescent spectra of indolizine modified SWCNTs (1b), phenol (P), 2-nitrophenol (2NP), 3-nitrophenol (3NP), 4-nitrophenol (4NP), 4-nitrotoluene (4NT) and 2,4-dinitrotoluene (2\_4NT) in  $\text{CH}_3\text{CN}$ . Figure shows that analysed aromatic compounds has no significant contribution to the fluorescent intensity of 1b.



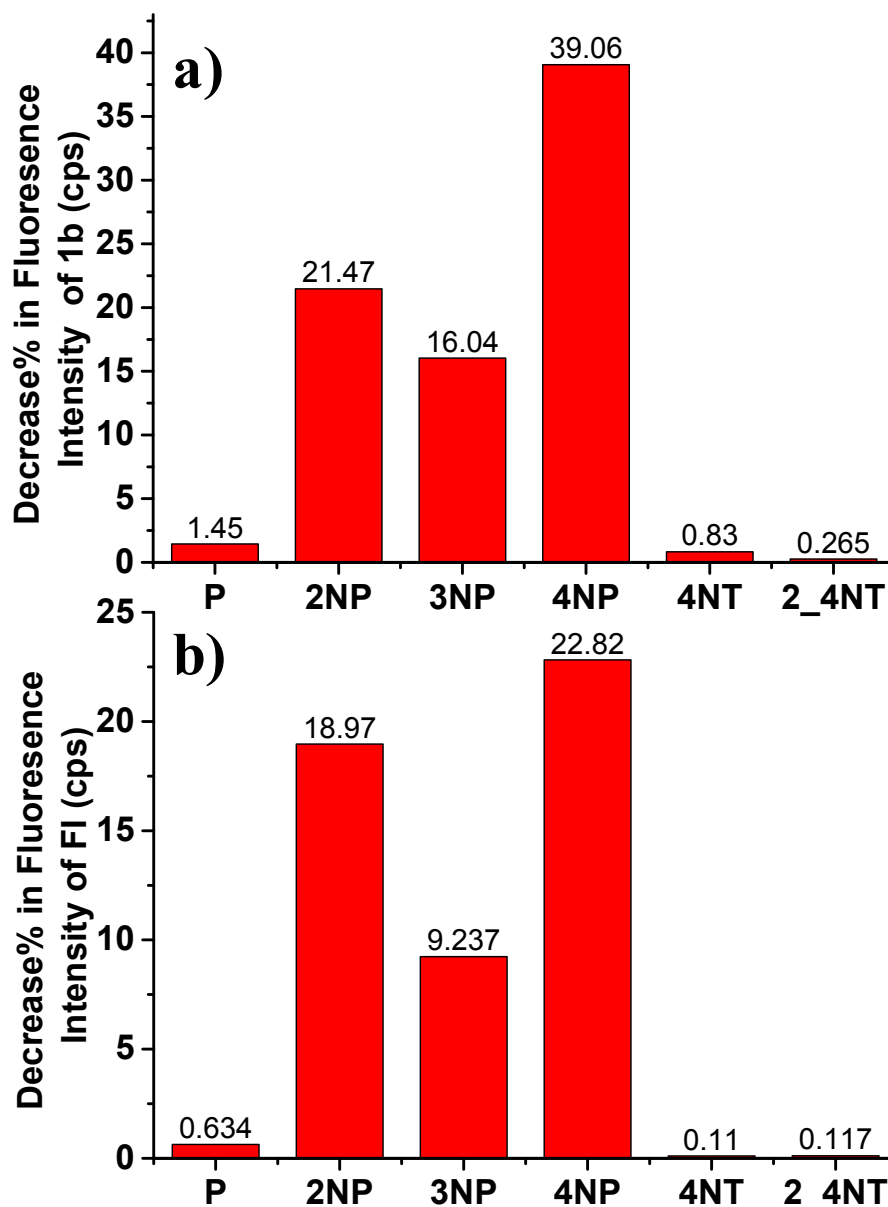

**Figure S4** (a) Percentage decrease in fluorescence intensity of indolizine functionalized SWCNTs (1b) (3 mL,  $1.25 \times 10^{-4}$  M); (b) free indolizine (FI) (3 mL,  $2.09 \times 10^{-7}$  M) upon the addition of (200  $\mu$ L,  $1 \times 10^{-4}$  M) phenol (P), 2-nitrophenol (2NP), 3-nitrophenol (3NP), 4-nitrophenol (4NP), 4-nitrotoluene (4NT) and 2,4-dinitrotoluene (2,4NT).

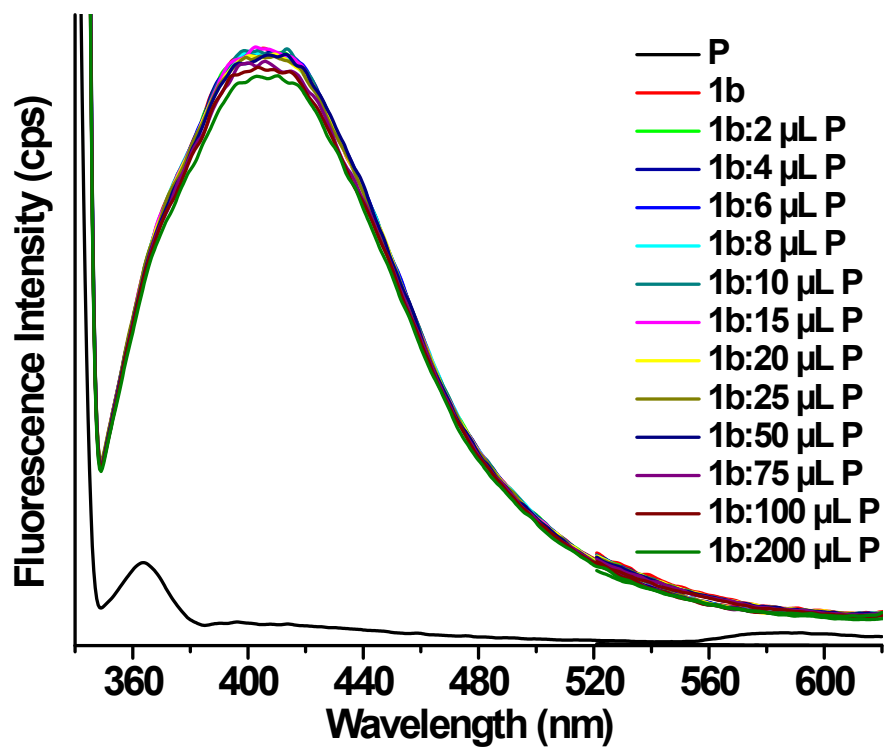

**Figure S5** Fluorescence spectra of 1b (3 mL,  $1.25 \times 10^{-4}$  M) excited at 330 nm in the presence of 2, 4, 6, 8, 10, 15, 20, 25, 50, 75, 100, 200  $\mu\text{L}$  equivalent of P ( $1 \times 10^{-4}$  M) dissolved in  $\text{CH}_3\text{CN}$ .

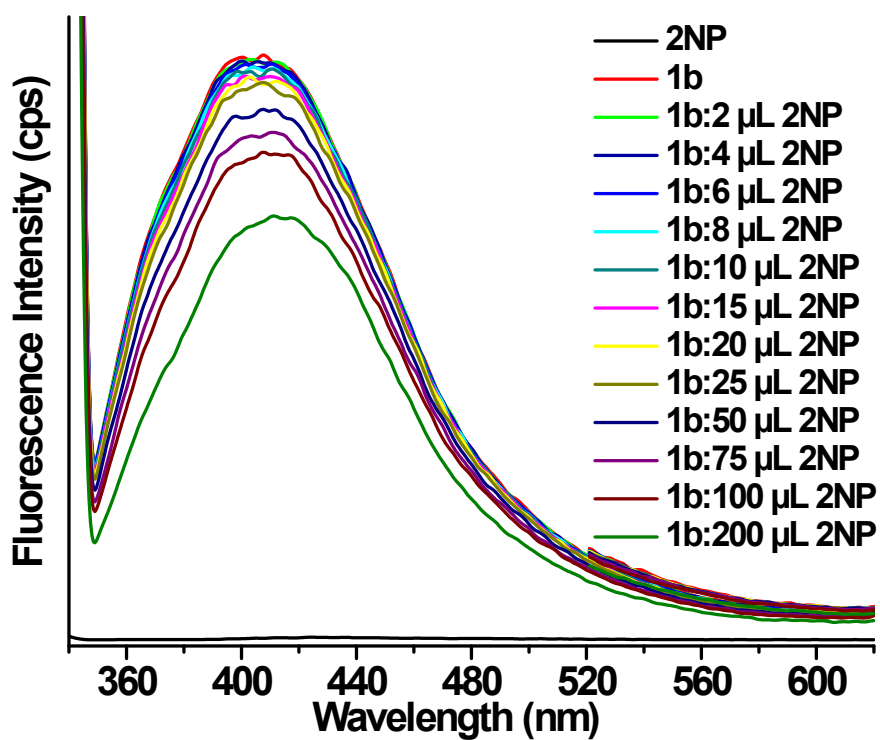

**Figure S6** Fluorescence spectra of 1b (3 mL,  $1.25 \times 10^{-4}$  M) excited at 330 nm in the presence of 2, 4, 6, 8, 10, 15, 20, 25, 50, 75, 100, 200  $\mu\text{L}$  equivalent of 2NP ( $1 \times 10^{-4}$  M) dissolved in  $\text{CH}_3\text{CN}$ .

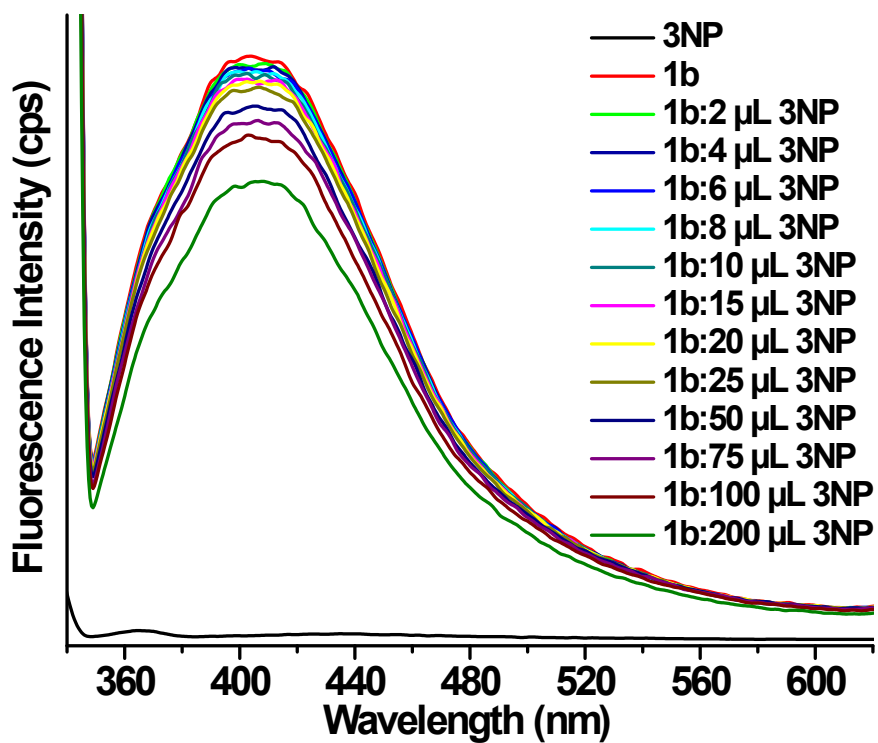

**Figure S7** Fluorescence spectra of 1b (3 mL,  $1.25 \times 10^{-4}$  M) excited at 330 nm in the presence of 2, 4, 6, 8, 10, 15, 20, 25, 50, 75, 100, 200  $\mu\text{L}$  equivalent of 3NP ( $1 \times 10^{-4}$  M) dissolved in  $\text{CH}_3\text{CN}$ .

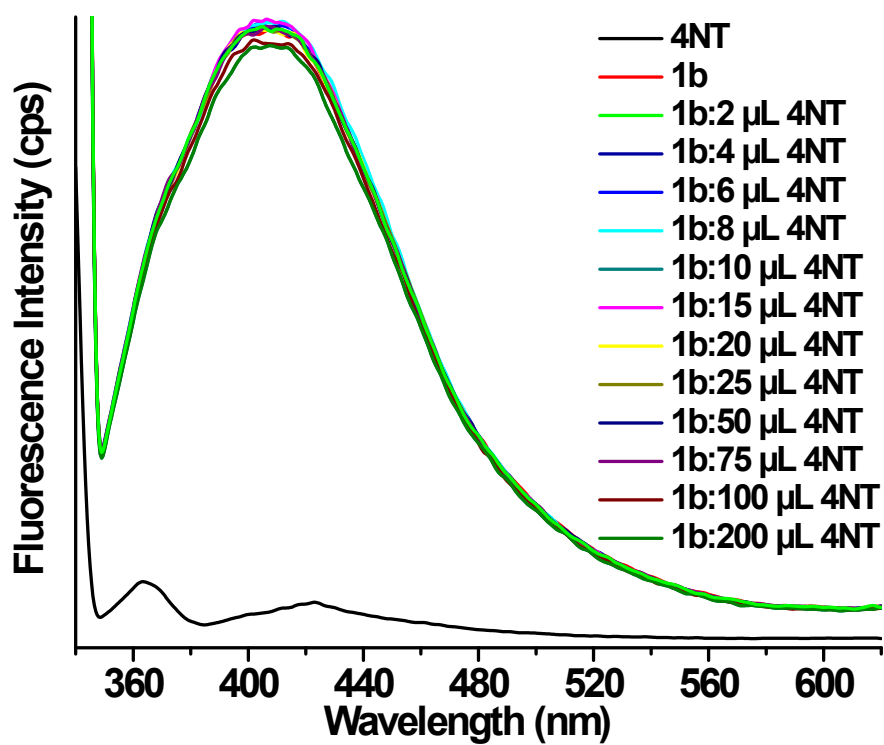

*Figure S8* Fluorescence spectra of 1b (3 mL,  $1.25 \times 10^{-4}$  M) excited at 330 nm in the presence of 2, 4, 6, 8, 10, 15, 20, 25, 50, 75, 100, 200  $\mu$ L equivalent of 2NT ( $1 \times 10^{-4}$  M) dissolved in  $\text{CH}_3\text{CN}$ .

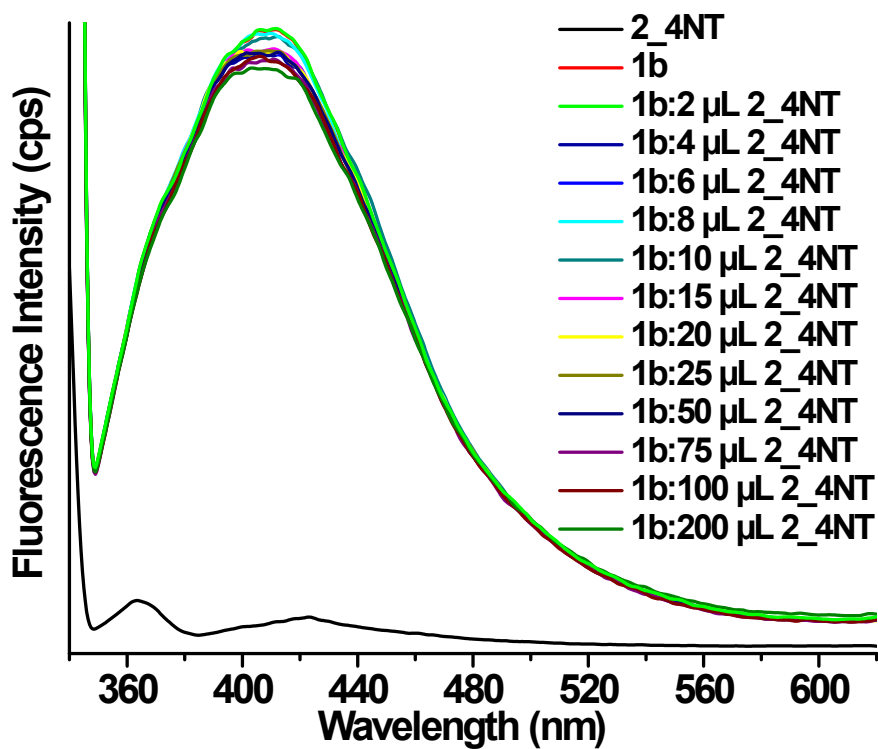

**Figure S9** Fluorescence spectra of 1b (3 mL,  $1.25 \times 10^{-4}$  M) excited at 330 nm in the presence of 2, 4, 6, 8, 10, 15, 20, 25, 50, 75, 100, 200  $\mu$ L equivalent of 2\_4NT ( $1 \times 10^{-4}$  M) dissolved in  $\text{CH}_3\text{CN}$ .

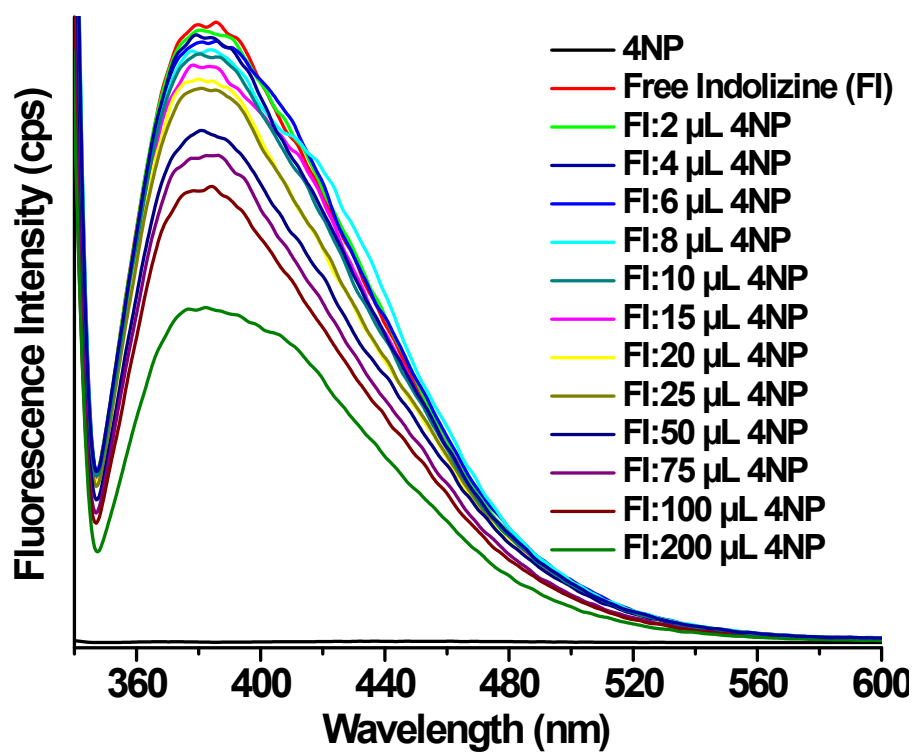

*Figure S10* Fluorescence spectra of FI (3 mL,  $2.09 \times 10^{-7}$  M) excited at 330 nm in the presence of 2, 4, 6, 8, 10, 15, 20, 25, 50, 75, 100, 200  $\mu$ L equivalent of 4NP ( $1 \times 10^{-4}$  M) dissolved in  $\text{CH}_3\text{CN}$ .

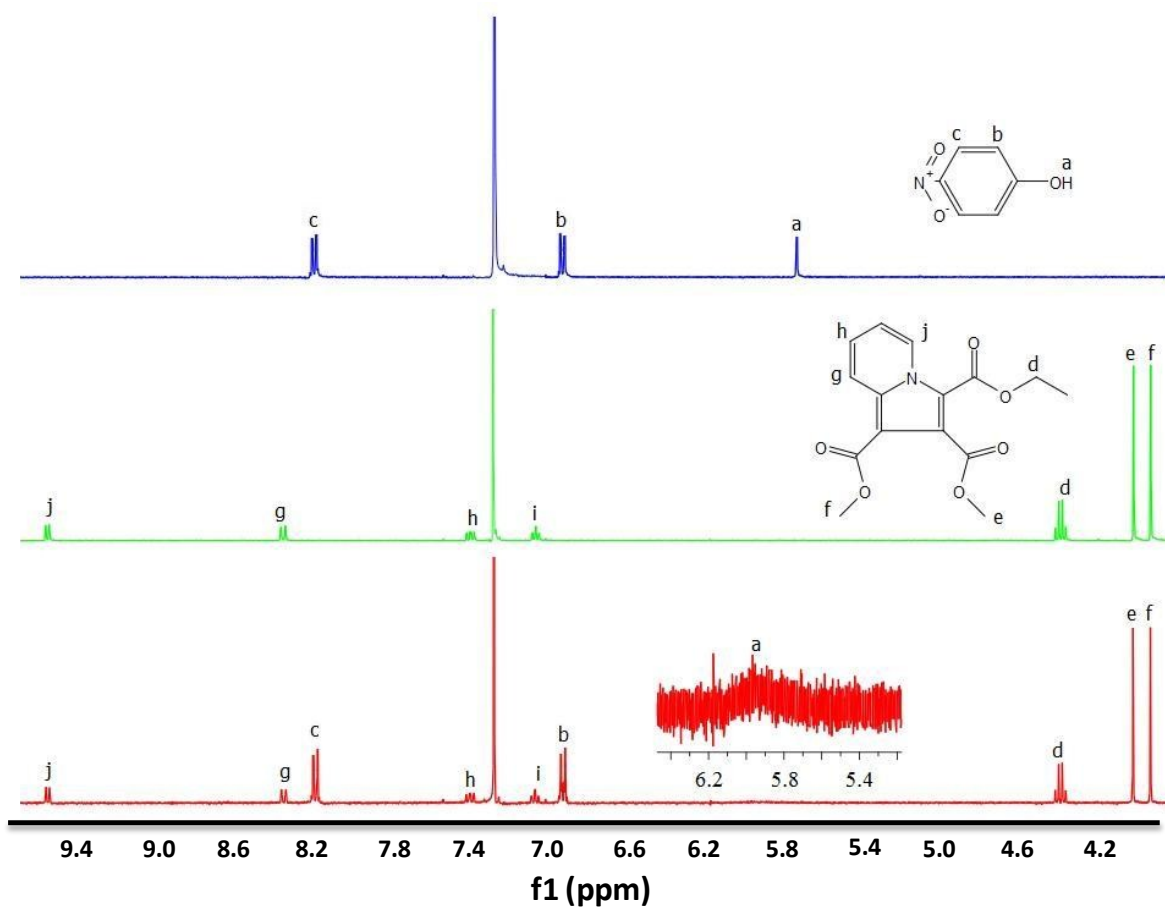

**Figure S11**  $^1\text{H}$  NMR spectra (400 MHz,  $\text{CDCl}_3$ , 298 K) of 4NP, FI and possible FI:4NP complex formed.



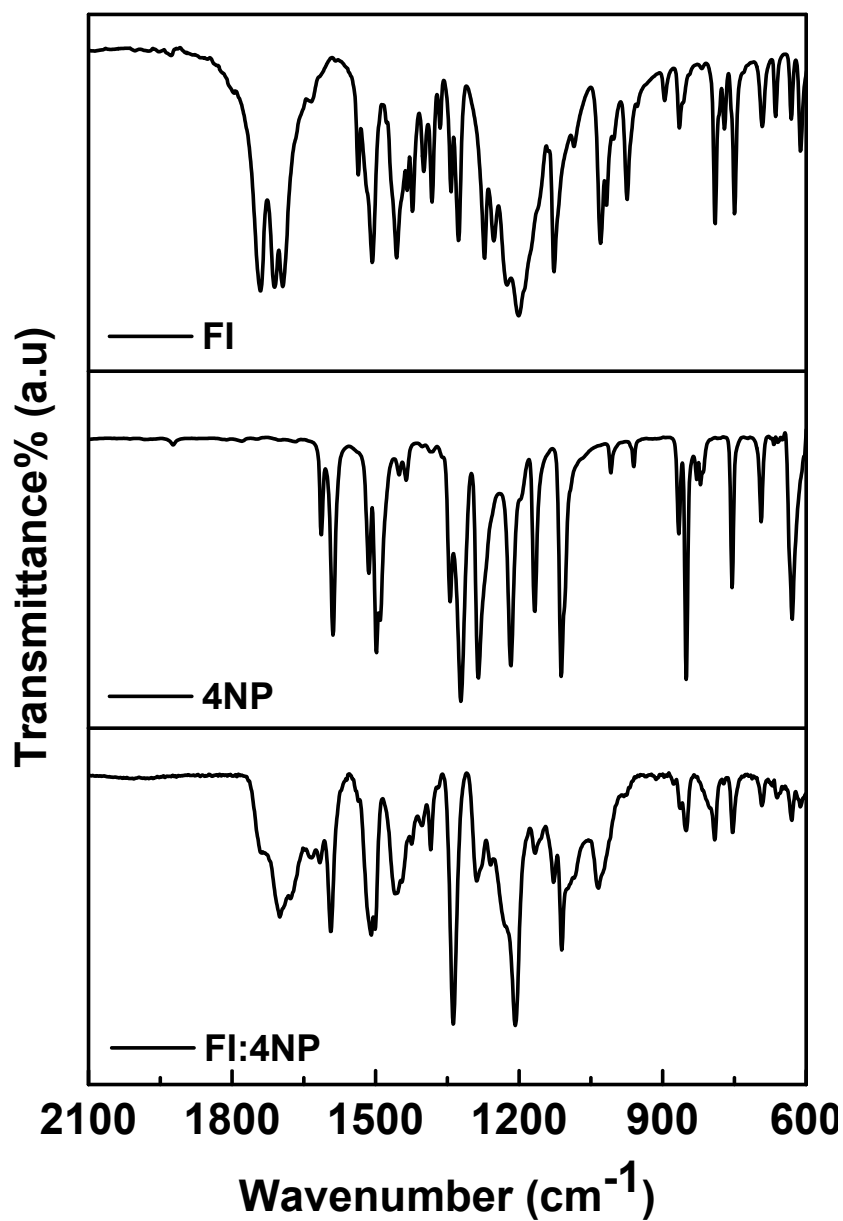

**Figure S12** FTIR spectra of FI, 4NP and possible FI:4NP complex formed.

1. G. H. Yue, Y. D. Wan, S. J. Song, G. C. Yang and Z. X. Chen, *Bioorganic & Medicinal Chemistry Letters*, 2005, **15**, 453-458.
2. F. D. Bellamy and K. Ou, *Tetrahedron Letters*, 1984, **25**, 839-842.
3. L. O. Palsson and A. P. Monkman, *Adv. Mater.*, 2002, **14**, 757-758.
